# Supplementary material for: Shifted to the South, Shifted to the North, but No Expansion: Potential Suitable Habitat Distribution Shift and Conservation Gap of the Critically Endangered Baer’s Pochard (Aythya baeri)
Source: MDPI journal article supplement (doi:10.3390/rs14092171), 2022-04-30
Supplement: s1 [file s1]

Archive with 3 entries (3 files):
- Supplement Figures_0430.pdf
- Supplement Table S1 Field survey sites for Baerí»s Pochard during 2014-2021(1).pdf
- Supplement Table S2.xlsx
