# Supplementary material for: Shifted to the South, Shifted to the North, but No Expansion: Potential Suitable Habitat Distribution Shift and Conservation Gap of the Critically Endangered Baer’s Pochard (Aythya baeri)
Source: MDPI journal article supplement (doi:10.3390/rs14092171), 2022-04-30
Supplement: s1 [file s1]

**Supplement Table S1.** Field survey sites for Baer's Pochard during 2014-2021.

| Country     | Province           | No. of Locations | No. of observation sites | Year      | Season                                   |
|-------------|--------------------|------------------|--------------------------|-----------|------------------------------------------|
| China       | Heilongjiang       | 11               | 33                       | 2016      | May                                      |
|             | Jilin              | 7                | 20                       | 2016      | May                                      |
|             | Liaoning           | 4                | 8                        | 2018-2021 | Jun., Sep., Oct.                         |
|             | Inner Mongolia     | 13               | 51                       | 2017-2018 | Apr., May, Jun., Jul., Aug., Sep.        |
|             | Beijing            | 9                | 23                       | 2014-2022 | All                                      |
|             | Tianjin            | 6                | 22                       | 2016-2021 | All                                      |
|             | Hebei              | 12               | 38                       | 2014-2020 | Jan., Mar., Apr., May., Jun., Aug., Nov. |
|             | Shandong           | 3                | 23                       | 2016-2019 | Apr., May, Jun., Jul., Aug.              |
|             | Shanxi             | 2                | 6                        | 2019      | Mar., Sep.                               |
|             | Shaanxi            | 2                | 2                        | 2017      | Sep                                      |
|             | Henan              | 14               | 24                       | 2016-2020 | Jan., Feb., Apr., Jun., Aug., Oct.       |
|             | Anhui              | 10               | 17                       | 2018-2020 | Jan.                                     |
|             | Qinghai            | 5                | 20                       | 2017-2019 | Jul., Aug.,                              |
|             | Gansu              | 1                | 2                        | 2019      | Aug.                                     |
|             | Ningxia            | 2                | 6                        | 2017      | Nov.                                     |
|             | Sichuan            | 8                | 34                       | 2015-2020 | Jan., Feb.                               |
|             | Chongqing          | 8                | 14                       | 2015-2021 | Jan., Apr., Dec.                         |
|             | Hunan              | 3                | 9                        | 2017-2020 | Jan., Aug                                |
|             | Hubei              | 12               | 55                       | 2016-2019 | Jan., May., Jun, Jul., Nov., Dec.        |
|             | Jiangxi            | 7                | 35                       | 2016-2020 | Jan., Mar., Jun., Jul., Oct., Dec.       |
|             | Jiangsu            | 3                | 33                       | 2016-2020 | Jan., Mar., Sep.                         |
|             | Shanghai           | 2                | 2                        | 2020      | Jan                                      |
|             | Zhejiang           | 3                | 3                        | 2018      | Sep                                      |
|             | Tibet              | 19               | 48                       | 2019      | Jul., Dec.                               |
|             | Yunan              | 5                | 12                       | 2016-2021 | Jan., Oct.,                              |
|             | Xinjiang           | 5                | 5                        | 2017-2018 | Aug.                                     |
|             | Hainan             | 1                | 1                        | 2018      | Dec.                                     |
|             | Taiwan             | 3                | 3                        | 2018      | Jun.                                     |
| South Korea | Incheon            | 1                | 1                        | 2017      | Nov.                                     |
|             | Ulsan              | 1                | 10                       | 2017      | Nov.                                     |
| Japan       | Hokkaido           | 2                | 2                        | 2017      | Aug., Nov.                               |
|             | Greater Tokyo Area | 1                | 1                        | 2017      | Nov.                                     |
| Total       |                    | 185              | 563                      |           |                                          |
