# Supplementary material for: Shifted to the South, Shifted to the North, but No Expansion: Potential Suitable Habitat Distribution Shift and Conservation Gap of the Critically Endangered Baer’s Pochard (Aythya baeri)
Source: MDPI journal article supplement (doi:10.3390/rs14092171), 2022-04-30
Supplement: s1 [file s1]

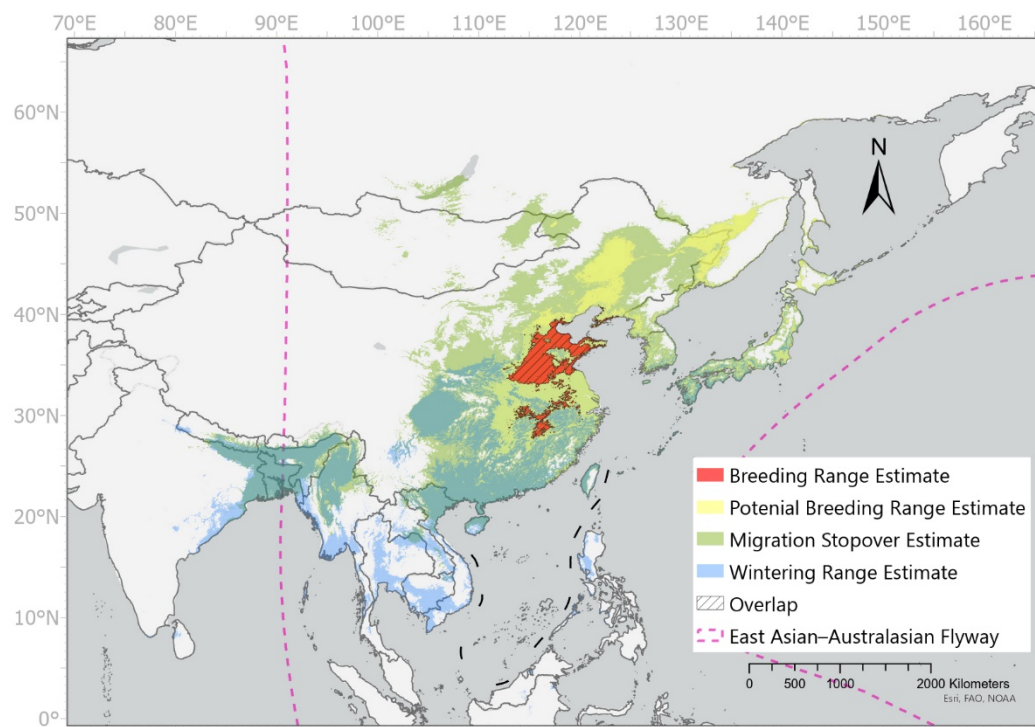

**Figure S1.** Current distribution range estimate of Baer's Pochard and their overlap.

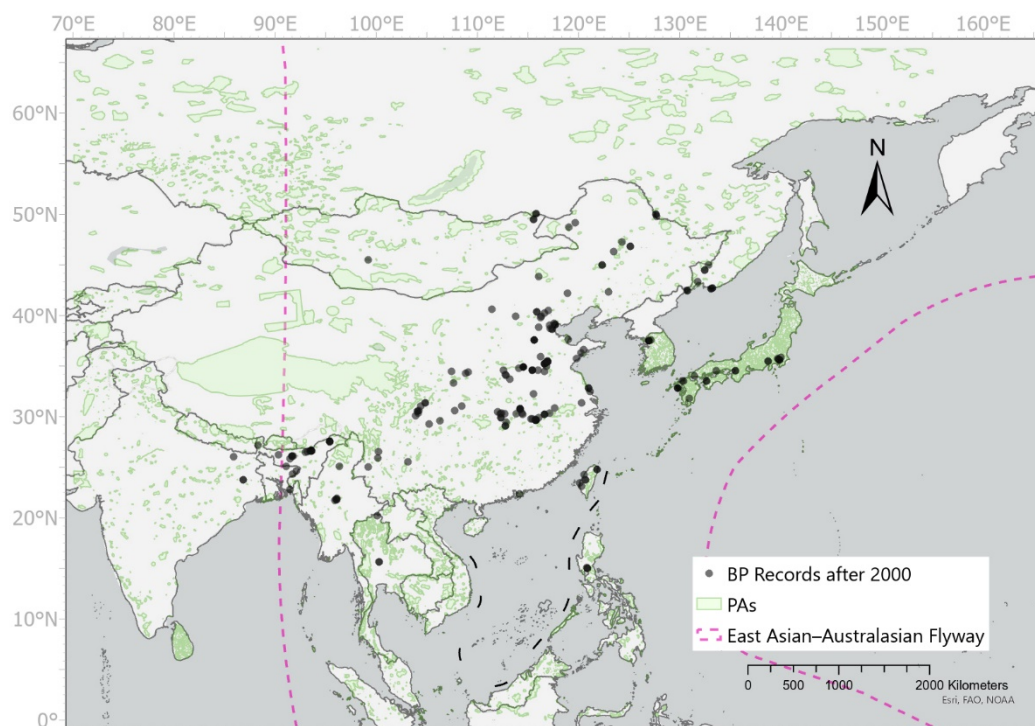

**Figure S2.** Only a few present sites are in the PAs which may provide protected habitat for this species.

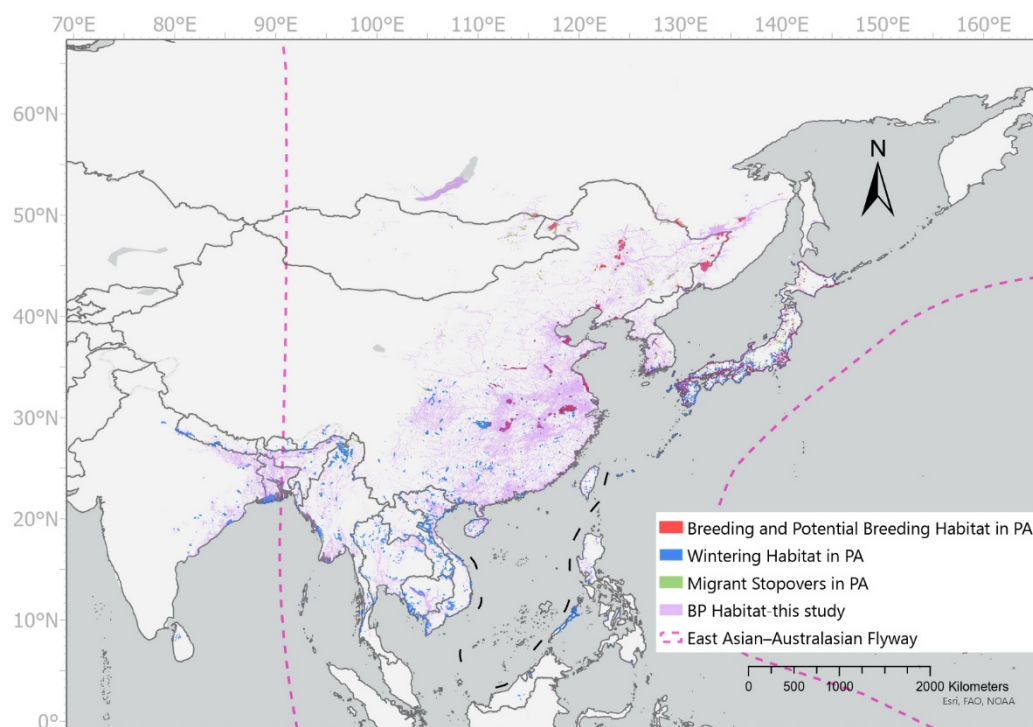

**Figure S3.** Suitable habitat covered by protect area.

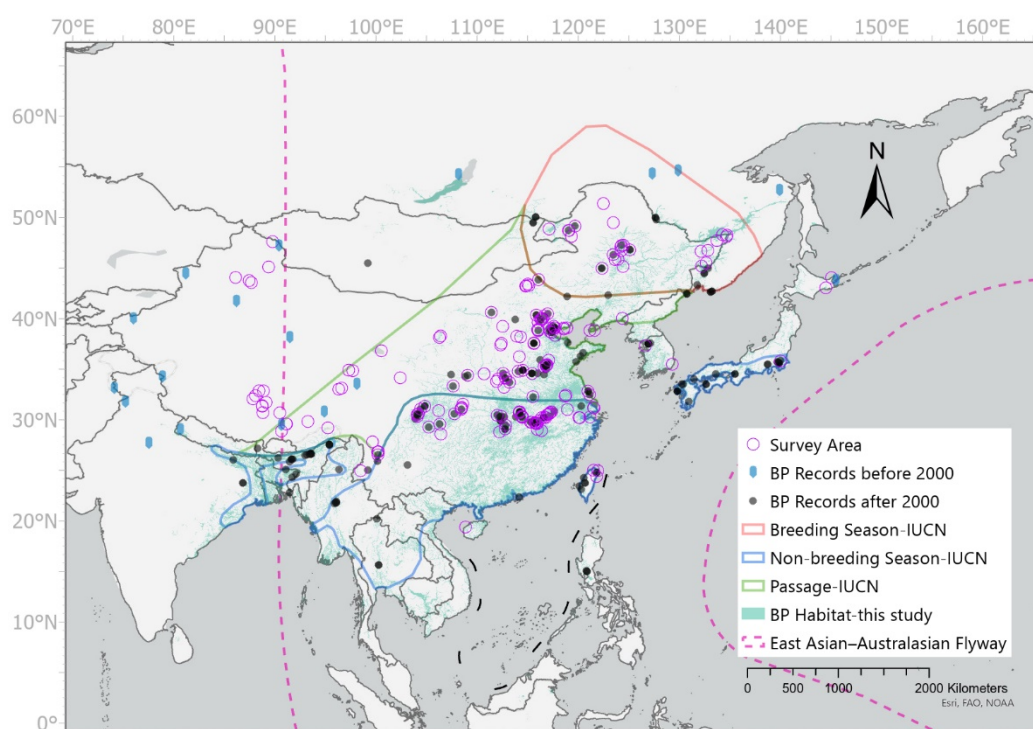

**Figure S4.** The range of Bear's Pochard recedes into eastern Asia.
