# Supplementary material for: Shifted to the South, Shifted to the North, but No Expansion: Potential Suitable Habitat Distribution Shift and Conservation Gap of the Critically Endangered Baer’s Pochard (Aythya baeri)
Source: MDPI journal article supplement (doi:10.3390/rs14092171), 2022-04-30
Supplement: s1 [file s1 › Supplement Table S2.xlsx]

## Sheet: Sheet1
Table S2. Environmental variables used for modeling the suitability habitat of Baer’s Pochard in East Asian–Australasian Flyway. Note: The selectedl variables for model development are shown in bold.
Environmental Variables	Annual mean temperature (bio1)	Mean diurnal range (bio2)	Isothermality (bio3)	Temperature seasonality (bio4)	Max temperature for warmest month (bio5)	Min temperature for coldest month (bio6)	Temperature annual range (bio7)	Mean temperature of wettest quarter (bio8)	Mean temperature of driest quarter (bio9)	Mean temperature of warmest quarter (bio10)	Mean temperature of coldest quarter (bio11)	Annual precipitation (bio12)	Precipitation of wettest month (bio13)	Precipitation of driest month (bio14)	Precipitation seasonality (bio15)	Precipitation of wettest quarter (bio16)	Precipitation of driest quarter (bio17)	Precipitation of warmest quarter (bio18)	Precipitation of coldest quarter (bio19)	Elevation
Annual mean temperature (bio1)	1	-0.24392	0.76558	-0.8492	0.86488	0.96579	-0.82514	0.82638	0.95026	0.90311	0.97823	0.64086	0.64289	0.26785	0.21889	0.65006	0.30333	0.42754	0.3194	-0.27956
Mean diurnal range (bio2)	-0.24392	1	-0.14009	0.34047	0.02493	-0.3624	0.47702	-0.11323	-0.27297	-0.13252	-0.29994	-0.55935	-0.41971	-0.36246	0.39613	-0.45112	-0.38749	-0.4763	-0.34747	0.24457
Isothermality (bio3)	0.76558	-0.14009	1	-0.86326	0.48374	0.82944	-0.83273	0.48109	0.79389	0.51975	0.83312	0.68119	0.59219	0.46851	0.16278	0.6092	0.49404	0.38072	0.52182	0.06174
Temperature seasonality (bio4)	-0.8492	0.34047	-0.86326	1	-0.48359	-0.94962	0.98703	-0.4738	-0.88637	-0.54308	-0.93895	-0.67685	-0.63962	-0.32417	-0.19312	-0.65537	-0.35759	-0.47389	-0.37435	-0.14701
Max temperature for warmest month (bio5)	0.86488	0.02493	0.48374	-0.48359	1	0.71282	-0.43577	0.91523	0.75425	0.98497	0.74905	0.38476	0.43737	0.11744	0.23643	0.43067	0.14244	0.21109	0.15688	-0.54969
Min temperature for coldest month (bio6)	0.96579	-0.3624	0.82944	-0.94962	0.71282	1	-0.94188	0.69354	0.9576	0.77149	0.99697	0.70616	0.6807	0.32526	0.18195	0.69375	0.36232	0.48537	0.37553	-0.11923
Temperature annual range (bio7)	-0.82514	0.47702	-0.83273	0.98703	-0.43577	-0.94188	1	-0.45164	-0.86762	-0.51827	-0.92063	-0.72194	-0.66406	-0.36116	-0.12025	-0.68402	-0.39675	-0.52177	-0.40678	-0.1103
Mean temperature of wettest quarter (bio8)	0.82638	-0.11323	0.48109	-0.4738	0.91523	0.69354	-0.45164	1	0.66539	0.92964	0.71982	0.45557	0.48537	0.16082	0.23268	0.48466	0.18308	0.33959	0.17879	-0.58694
Mean temperature of driest quarter (bio9)	0.95026	-0.27297	0.79389	-0.88637	0.75425	0.9576	-0.86762	0.66539	1	0.79836	0.96268	0.6329	0.61686	0.29211	0.13791	0.62664	0.32986	0.38096	0.35765	-0.14986
Mean temperature of warmest quarter (bio10)	0.90311	-0.13252	0.51975	-0.54308	0.98497	0.77149	-0.51827	0.92964	0.79836	1	0.79834	0.47762	0.50834	0.17534	0.17738	0.50672	0.20432	0.28761	0.21612	-0.58176
Mean temperature of coldest quarter (bio11)	0.97823	-0.29994	0.83312	-0.93895	0.74905	0.99697	-0.92063	0.71982	0.96268	0.79834	1	0.68248	0.66816	0.30456	0.21078	0.67895	0.34065	0.45945	0.35775	-0.13159
Annual precipitation (bio12)	0.64086	-0.55935	0.68119	-0.67685	0.38476	0.70616	-0.72194	0.45557	0.6329	0.47762	0.68248	1	0.88861	0.62529	-0.08142	0.92049	0.66018	0.8	0.63446	-0.24304
Precipitation of wettest month (bio13)	0.64289	-0.41971	0.59219	-0.63962	0.43737	0.6807	-0.66406	0.48537	0.61686	0.50834	0.66816	0.88861	1	0.27495	0.2369	0.99097	0.31245	0.72137	0.4146	-0.20664
Precipitation of driest month (bio14)	0.26785	-0.36246	0.46851	-0.32417	0.11744	0.32526	-0.36116	0.16082	0.29211	0.17534	0.30456	0.62529	0.27495	1	-0.48134	0.31446	0.99429	0.3997	0.78611	-0.18627
Precipitation seasonality (bio15)	0.21889	0.39613	0.16278	-0.19312	0.23643	0.18195	-0.12025	0.23268	0.13791	0.17738	0.21078	-0.08142	0.2369	-0.48134	1	0.19384	-0.48022	0.00883	-0.33624	0.24853
Precipitation of wettest quarter (bio16)	0.65006	-0.45112	0.6092	-0.65537	0.43067	0.69375	-0.68402	0.48466	0.62664	0.50672	0.67895	0.92049	0.99097	0.31446	0.19384	1	0.35282	0.75658	0.4293	-0.21001
Precipitation of driest quarter (bio17)	0.30333	-0.38749	0.49404	-0.35759	0.14244	0.36232	-0.39675	0.18308	0.32986	0.20432	0.34065	0.66018	0.31245	0.99429	-0.48022	0.35282	1	0.42933	0.79941	-0.1947
Precipitation of warmest quarter (bio18)	0.42754	-0.4763	0.38072	-0.47389	0.21109	0.48537	-0.52177	0.33959	0.38096	0.28761	0.45945	0.8	0.72137	0.3997	0.00883	0.75658	0.42933	1	0.31134	-0.14975
Precipitation of coldest quarter (bio19)	0.3194	-0.34747	0.52182	-0.37435	0.15688	0.37553	-0.40678	0.17879	0.35765	0.21612	0.35775	0.63446	0.4146	0.78611	-0.33624	0.4293	0.79941	0.31134	1	-0.1529
Elevation	-0.27956	0.24457	0.06174	-0.14701	-0.54969	-0.11923	-0.1103	-0.58694	-0.14986	-0.58176	-0.13159	-0.24304	-0.20664	-0.18627	0.24853	-0.21001	-0.1947	-0.14975	-0.1529	1
